# Supplementary material for: The Role of Oxidation Pattern and Water Content in the Spatial Arrangement and Dynamics of Oxidized Graphene-Based Aqueous Dispersions
Source: MDPI journal article supplement (doi:10.3390/ijms232113459), 2022-11-03
Supplement: s1 [file s1]

## Supporting Information

### The Role of Oxidation Pattern and Water Content in the Spatial Arrangement and Dynamics of Oxidized Graphene-based Aqueous Dispersions

**A. Rissanou<sup>1,2,3</sup>, I. Karnis<sup>3,4</sup>, F. Krasanakis<sup>3</sup>, K. Chrissopoulou<sup>3</sup>, K. Karatasos<sup>1,2\*</sup>**

1. Department of Chemical Engineering, University of Thessaloniki, P.O. BOX 420, 54124 Thessaloniki, Greece.

2. Department of Mathematics and Applied Mathematics, University of Crete, GR-71409, Heraklion, Crete, Greece

3. Institute of Electronic Structure and Laser, Foundation for Research and Technology-Hellas, 700 13 Heraklion Crete, Greece

4. Department of Chemistry, University of Crete, 70013 Heraklion Crete, Greece

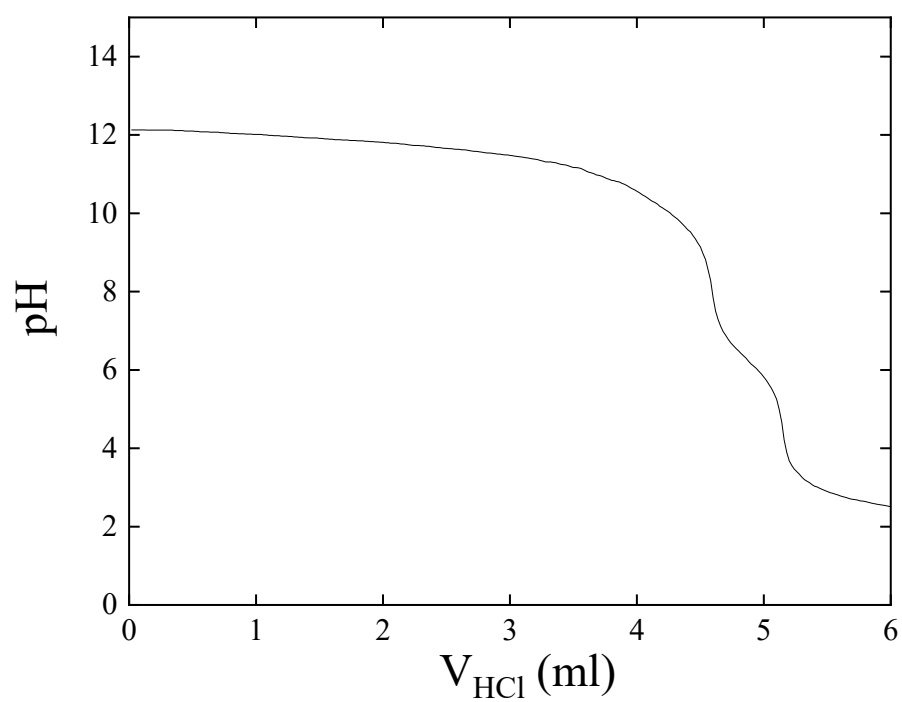

**Figure S1:** Titration curve of GO oxidized with 0.5 g of  $\text{KMnO}_4$ .

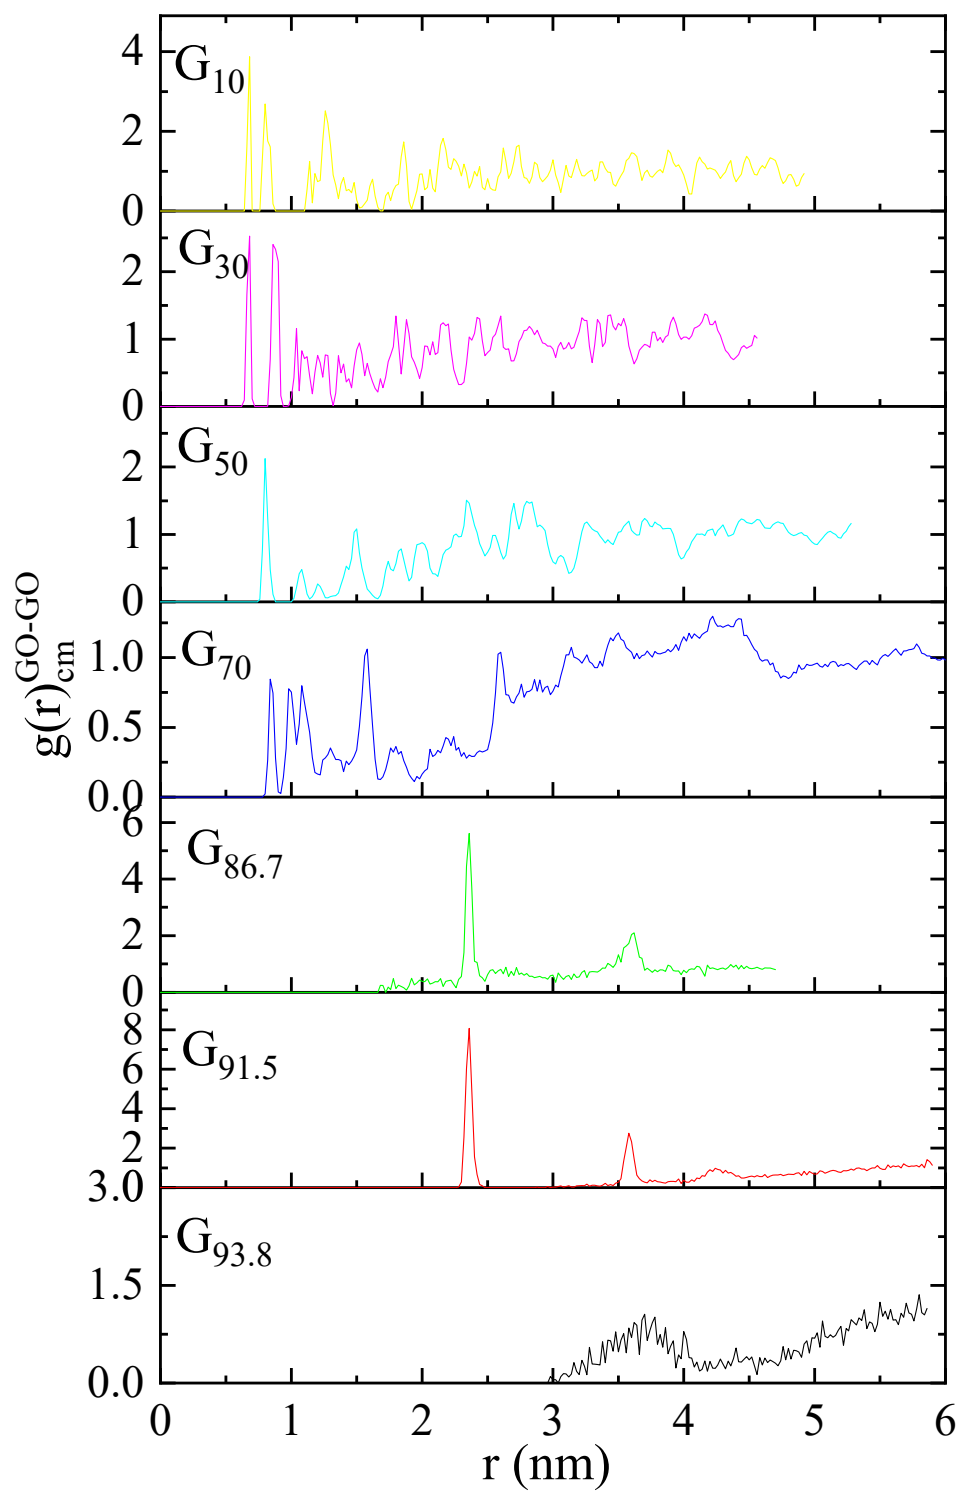

**Figure S2:** Radial distribution functions of the geometric centers of the GO-based systems.

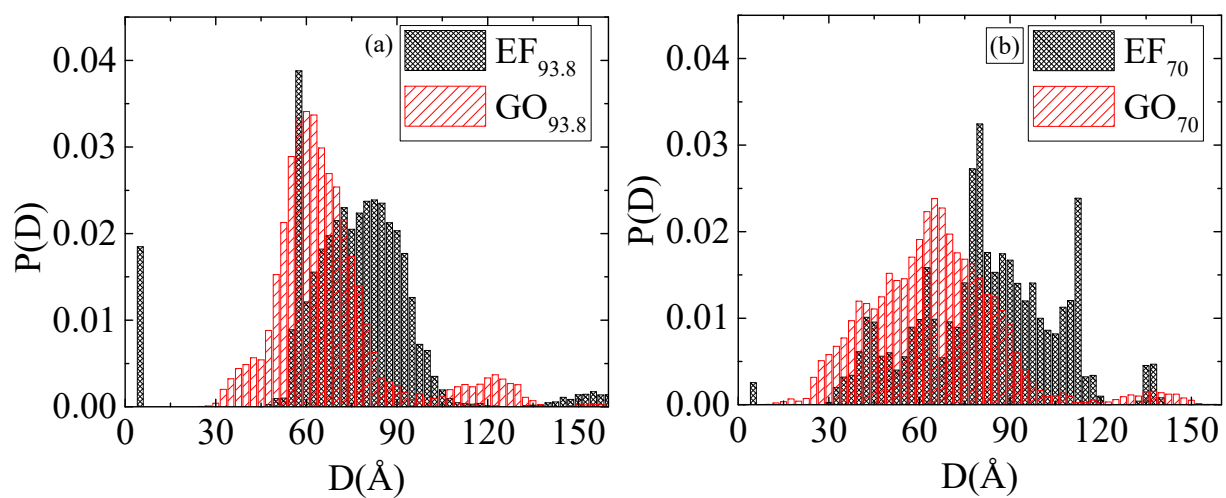

**Figure S3.** The probability distribution of the inter-sheet separation between all pairs of graphene sheets for the GO and the EF-based systems a)  $EF_{93.8}, GO_{93.8}$  b)  $EF_{70}, GO_{70}$

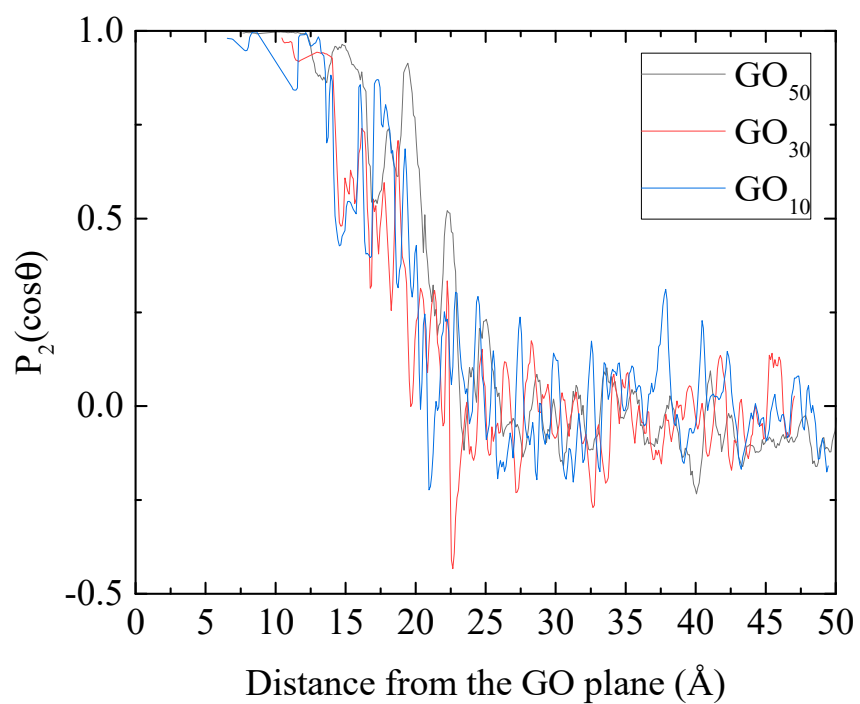

**Figure S4:** The orientational order parameter of the GO flakes as a function of their separation, for systems comprised by 56 flakes and at 50, 30 and 10 wt% water content.

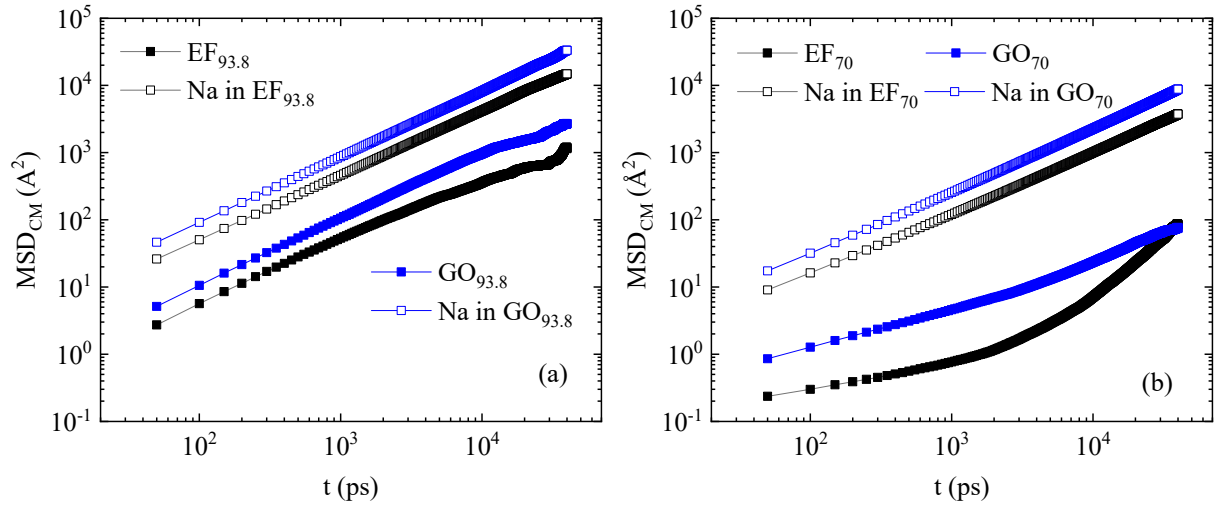

**Figure S5:** Comparison of the mean squared displacement of the sodium counterions and the center of mass of the EF and the GO flakes, at water contents : a) 93.8 % b) 70%

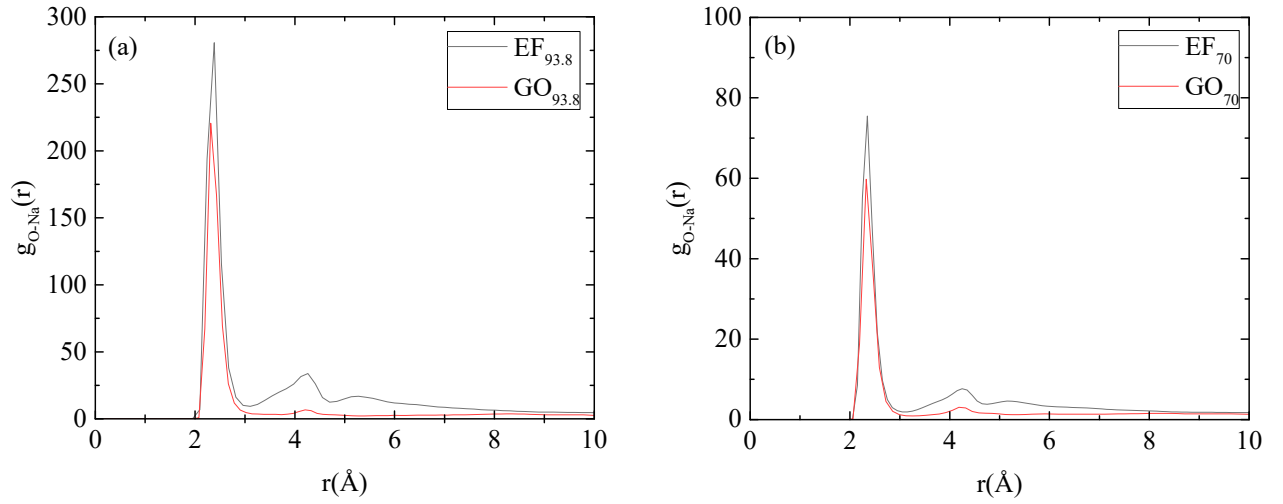

**Figure S6:** pair correlation functions between the sodium ions and the carboxyl oxygen of the flakes for the EF and the GO-based systems at water contents wt% a) 93.8% and b) 70%

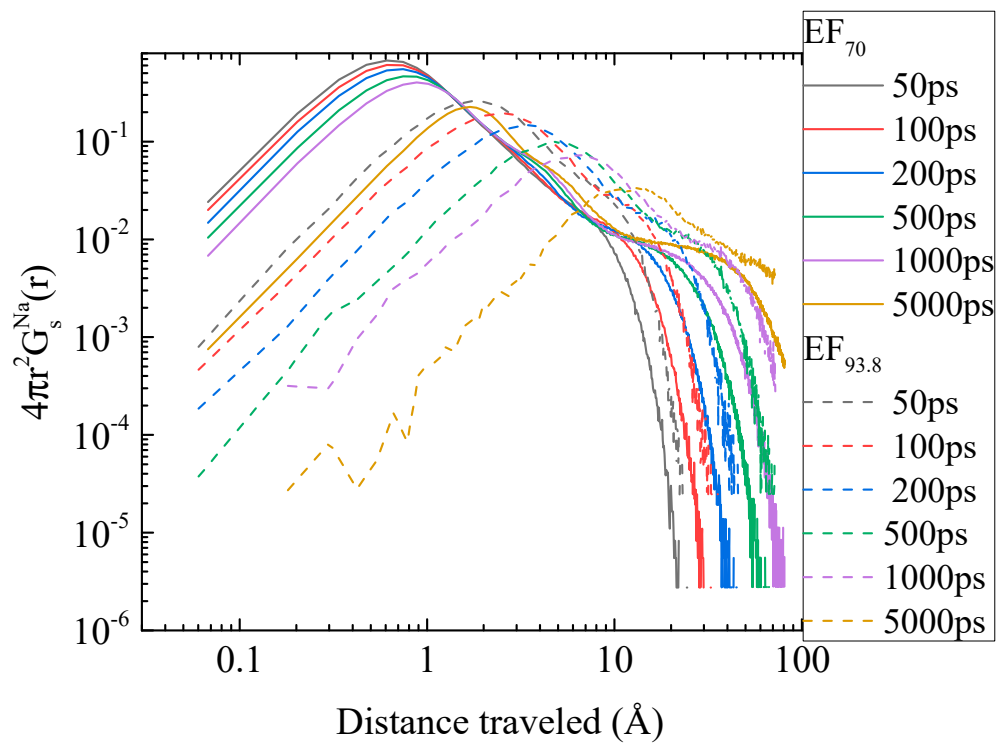

**Figure S7:** Comparison of the Self van Hove spectra of the Na<sup>+</sup> counterions in the EF-based systems at different timescales.

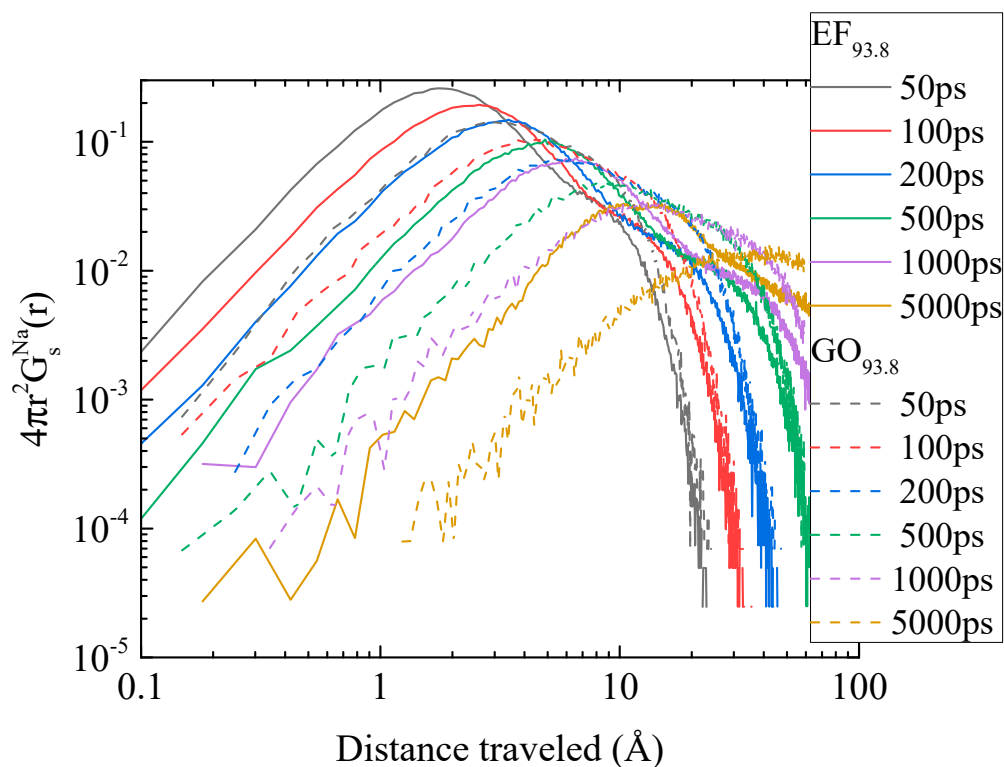

**Figure S8:** Comparison of the self van Hove functions of the Na<sup>+</sup> counterions between the EF and the GO based systems at 93.8% wt% in water content

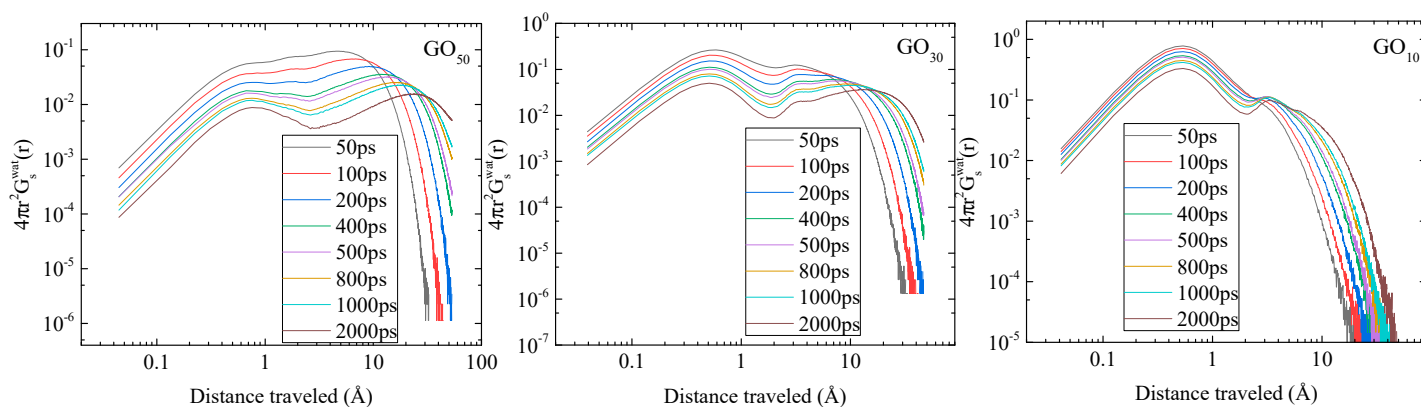

**Figure S9:** Self van Hove functions of the centers of mass of the water molecules for the lower water content systems of the GO-based models.



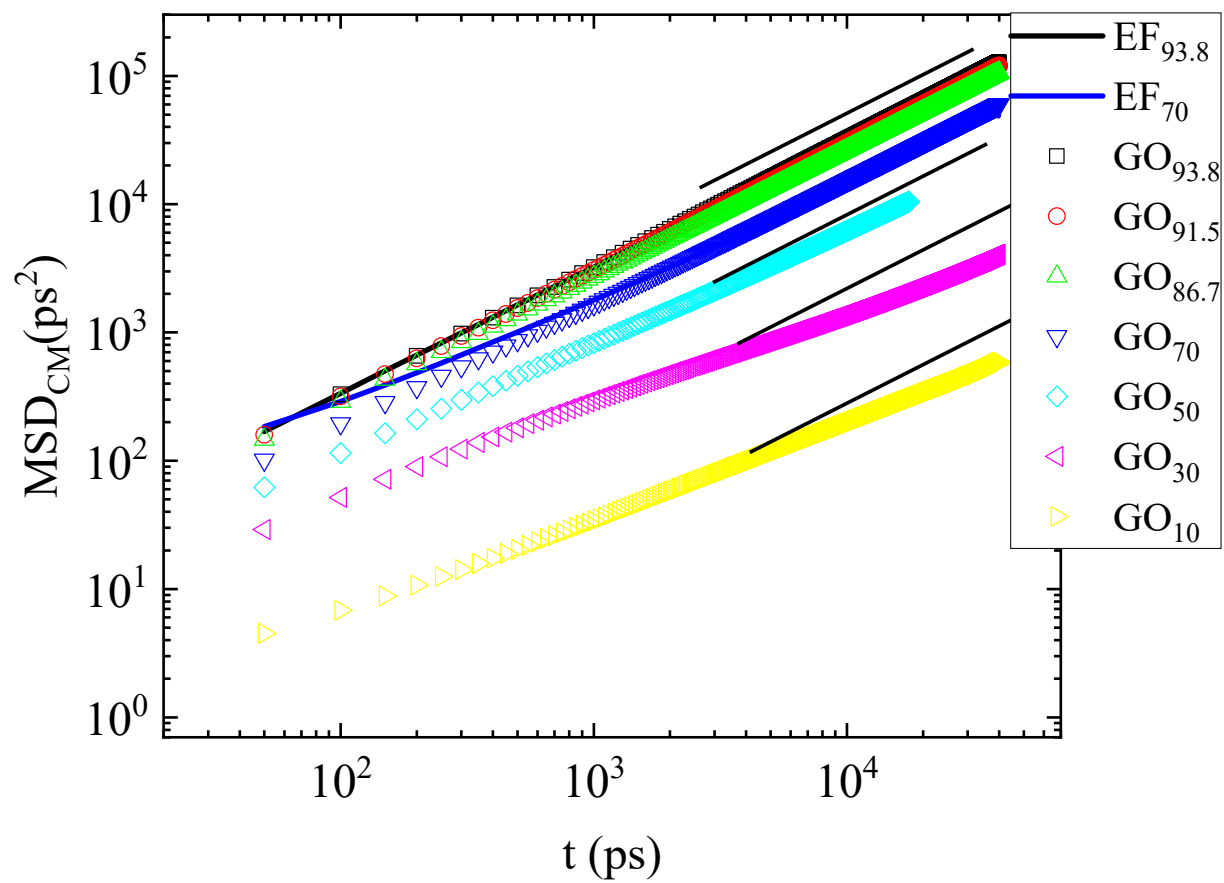

**Figure S10:** Mean squared displacement of the centers of mass of the water molecules for all the models examined. The short straight lines denote a slope of 1.
